# Supplementary material
Source: publisher figshare collection journal article supplement (https://sage.figshare.com/ndownloader/files/18598931)
Supplement: Supplementary file 1 [file 18598931]

#### **Supplement 4. Recommendations based on HTR audit**

|                                           |                                                                                                                                                                                                                                                                                                                                                                                                                                                                                                                            |
|-------------------------------------------|----------------------------------------------------------------------------------------------------------------------------------------------------------------------------------------------------------------------------------------------------------------------------------------------------------------------------------------------------------------------------------------------------------------------------------------------------------------------------------------------------------------------------|
| <b>Case completeness</b>                  | The registry inclusion and exclusion criteria should be clear and the enrolment process should be easily repeatable and if possible automated based on electronic structural patient charts. It is vital to report the case completeness result in an audit process of a trauma registry. This shows the basic reliability of the registry for future decision-making.                                                                                                                                                     |
| <b>Data completeness</b>                  | Due to various reasons data completeness does not always describe the reliability of the registry. In an audit process “best possible data completeness” should be used instead.                                                                                                                                                                                                                                                                                                                                           |
| <b>Data accuracy and data correctness</b> | <p>Trained registry coders should perform all data handling and AIS calculations to produce systematically reliable data for the trauma registry databank. All difficult cases should be discussed in systematic quality control crosschecks among coders. In reporting data accuracy of the registry, data correctness may be more useful than exact accuracy.</p> <p>We recommend that trauma registry data should be gathered automatically from electronic medical data as much as possible to avoid human errors.</p> |
